# Supplementary material for: Choroid plexus LAT2 and SNAT3 as partners in CSF amino acid homeostasis maintenance
Source: Springer Nature journal article supplement (doi:10.1186/s12987-020-0178-x), 2020-02-11
Supplement: MOESM2 [file 17680434]

# Choroid plexus LAT2 and SNAT3 as partners in CSF amino acid homeostasis maintenance

Elena Dolgodilina, Simone M. Camargo, Eva Roth, Brigitte Herzog, Virginia Nunes, Manuel Palacín, Francois Verrey

## Additional file 2 Supplementary tables

Table S1: Antibody dilutions used

| Target protein                                         | Target sequence                  | Species of target protein | Host   | Dilution            | Manufacturer                       |
|--------------------------------------------------------|----------------------------------|---------------------------|--------|---------------------|------------------------------------|
| SNAT3 (SLC38A3)                                        | MEIPRQTEMVELVPNGKC (N-terminus)  | Mouse                     | Rabbit | 1:100               | In house via Pineda                |
| SNAT1 (SLC38A1)                                        | MMHFKSGLELTELQNMTVC (N-terminus) | Mouse                     | Rabbit | 1:100               | In house via Abent                 |
| LAT2 (SLC7A8)                                          | CPIFKPTPVKDPDSEEQP (C-terminus)  | Mouse                     | Rabbit | 1:100,<br>or 1:1000 | In house via Eurogentech           |
| AE2 (SLC4A2)                                           | 100-255 AA (N-terminus)          | Human                     | Mouse  | 1:100               | Santa Cruz Biotechnology SC-376632 |
| Na <sup>+</sup> -K <sup>+</sup> -ATPase $\alpha$ (H-3) | 551-850 AA                       | Human                     | Mouse  | 1:100               | Santa Cruz Biotechnology SC-48345  |

Table S2: Primers and probes used for qRT-PCR

|                | Gene               | Full name                                     | Accession number | Sequence                    |                                                                                  |
|----------------|--------------------|-----------------------------------------------|------------------|-----------------------------|----------------------------------------------------------------------------------|
| <b>Markers</b> |                    |                                               |                  |                             |                                                                                  |
| 1              | <i>Cd31/Pecam1</i> | platelet/endothelial cell adhesion molecule 1 | NM_008816        | forward<br>reverse<br>probe | TCCCCGAAGCAGCACTCT<br>CCGCAATGAGCCCTTTCTT<br>TCAGAGTCTTCCTTGCCCCA                |
| 2              | <i>Gfap</i>        | glial fibrillary acidic protein               | NM_010277        | forward<br>reverse<br>probe | CACAGCGGCCCTGAGAGA<br>GTCTGCAAACCTTAGACCGATACCA<br>ACTCAATACGAGGCAGTGGCCACCAGTAA |
| 3              | <i>Syp</i>         | Synaptophysin                                 | NM_009305        | forward<br>reverse<br>probe | GGGCCAATGATGGACTTCCT<br>GGATGAGCTAACTAGCCACATGAA<br>CACAGCAGTGTTTCGC             |
| 4              | <i>Slc2a1</i>      | Glut1                                         | NM_011400        | forward<br>reverse<br>probe | TCGTCGTTGGCATCCTTATTG<br>TGCATTGCCCATGATGGA<br>CCAGGTGTTTGGCTTAG                 |
| 5              | <i>Ttr</i>         | Transthyretin                                 | NM_013697.5      | forward<br>reverse<br>probe | CATGAATTCGCGGATGTG<br>GATGGTGTAGTGGCGATGG<br>Roche probe#76                      |

| Transporters |                 |       |              |                             |                                                                                  |
|--------------|-----------------|-------|--------------|-----------------------------|----------------------------------------------------------------------------------|
| 1            | <i>Slc1a1</i>   | Eaat3 | NM_009199.2  | forward<br>reverse<br>probe | GGTCTGCGCGCTGTAGTAT<br>TGAGTGACACCAGGCTTGATA<br>Roche probe #77                  |
| 2            | <i>Slc1a2</i>   | Eaat2 | NM_001077514 | forward<br>reverse<br>probe | TGCTCATCCTCCCCTTATCATC<br>GGCCGCTGGCTTTAGCAT<br>AGTTTAATCACAGGGTTGTC             |
| 3            | <i>Slc1a3</i>   | Eaat1 | NM_148938    | forward<br>reverse<br>probe | GAAGCCATCATGCGATTGGT<br>CCCTGCGATCAAGAAGAGGAT<br>CGGTGATAATGTGGTATGC             |
| 4            | <i>Slc1a4</i>   | Asct1 | NM_018861.3  | forward<br>reverse<br>probe | TGGACTCTTTCCTCGATTACTCA<br>AATCGGTTGCAGACGTAGTAA<br>CCTGTTCCCTTCCAATCTTGTGGTTGC  |
| 5            | <i>Slc1a5</i>   | Asct2 | D85044       | forward<br>reverse<br>probe | CATCCTGGAAGCAGTCAGCC<br>CACCTTCCACGTTGAGGACA<br>TGATCTTGGCCGTGGACTGGCTAGTG       |
| 6            | <i>Slc1a6</i>   | Eaat4 | NM_009200    | forward<br>reverse<br>probe | CCCCAGGCAGGACTGGTTA<br>TTGTACGAAGTCGGTCAAGGAA<br>TGATTGTGCTCACATCCGTCGGC         |
| 7            | <i>Slc6a5</i>   | Glyt2 | NM_148931.3  | forward<br>reverse<br>probe | ATGTTTGGAGGTTTCCCTACC<br>TCAAGTAAGGGATGAGGAACG<br>Roche probe #97                |
| 8            | <i>Slc6a6</i>   | Taut  | NM_009320    | forward<br>reverse<br>probe | GCAACGTCTGGCGTTTCC<br>AGGCCGCTCCCAAACAG<br>TGC GTT CCTCATACCGT                   |
| 9            | <i>Slc6a7</i>   | Prot  | NM_201353.1  | forward<br>reverse<br>probe | GGAAGGGCATCCAGTTCTATC<br>AGCAGCTTCAATCCACACCT<br>Roche probe #77                 |
| 10           | <i>Slc6a9</i>   | Glyt1 | NM_008135.4  | forward<br>reverse<br>probe | AATGTCTGGCGTTTCCATA<br>TGATGAAGTAGGGGAACATGAA<br>Roche probe #52                 |
| 11           | <i>Slc6a20b</i> | SIT1  | NM_011731.3  | forward<br>reverse<br>probe | GGAAGCATGCTTGGAAACACAG<br>AACACCATGCCAACAGCACA<br>AGGAGGCCATTTAGGTTTGGTATGCCTC   |
| 12           | <i>Slc7a1</i>   | Cat1  | NM_007513.4  | forward<br>reverse<br>probe | GGCAGCTCACGGAGAAAAATT<br>TCCCTCACCGTATTTACGTT<br>TCCTGTAACAACAACGACAC            |
| 13           | <i>Slc7a2</i>   | Cat2  | NM_007514.3  | forward<br>reverse<br>probe | CATCACTGGCTGGAATCTCATC<br>ACTCCATGCTCTTGC GACT<br>TGTCATATGCATAGGTACGTC          |
| 14           | <i>Slc7a3</i>   | Cat3  | NM_007515.2  | forward<br>reverse<br>probe | ACTCCCTGGTGTCCATTTGTG<br>TCTTCAACTCTTCATTTCTGATC<br>TCTCATCCTCAGATATCA           |
| 15           | <i>Slc7a4</i>   | Cat4  | NM_144852.3  | forward<br>reverse<br>probe | GGCTCTATCTGTGCCATGAACA<br>GCGCGGCAGGGAGAA<br>TCCTGCTCAGCAACC                     |
| 16           | <i>Slc7a5</i>   | Lat1  | NM_011404    | forward<br>reverse<br>probe | GGAGGATGGA ACTATCTGAATTTG<br>GGTTGGTAGAGGGGTAGTGAATAGG<br>CTACAGGAACCTGCCCTGGCCA |

|    |                 |        |              |                             |                                                                                      |
|----|-----------------|--------|--------------|-----------------------------|--------------------------------------------------------------------------------------|
| 17 | <i>Slc7a6</i>   | y+Lat2 | BC038404     | forward<br>reverse<br>probe | TACATCCTGACCAACGTGGC<br>ATGCCGAATGTCTGGTCAGC<br>TCCATAAGAGTGACGCTGTGCCTGTGA          |
| 18 | <i>Slc7a7</i>   | y+Lat1 | NM_011405    | forward<br>reverse<br>probe | AATTCCAGTAGCGGTTGCATT<br>GGAGGTGGCCTTCTCTCGAG<br>TTGCTTTGGTGGGCTCAACGCC              |
| 19 | <i>Slc7a8</i>   | Lat2   | NM_016972    | forward<br>reverse<br>probe | TCCACGTTTGGTGGAGTCAA<br>TCACACAACCGGTACTAGGT<br>CTCCCTCTTCACCTCCTCCCGGCT             |
| 20 | <i>Slc7a10</i>  | Asc1   | NM_017394.4  | forward<br>reverse<br>probe | TGGCTGGAACCTCCTCAACT<br>GATGGCACGAGGTAGGTTCT<br>Roche probe #17                      |
| 21 | <i>Slc7a11</i>  | xCT    | NM_011990.2  | forward<br>reverse<br>probe | ACCATCAGTGC GGAGGAG<br>AAGATCGGGACTGCTAATGAGA<br>Roche probe #3                      |
| 22 | <i>Slc7a12</i>  | Asc2   | NM_080852    | forward<br>reverse<br>probe | CAGAACCCTGATATACCAAGACCT<br>GGAAAAGTGATAAAGCTATAGATCCAA<br>Roche probe #5            |
| 23 | <i>Slc16a10</i> | TAT1   | NM_028247.4  | forward<br>reverse<br>probe | CGCCTACGGGGTGCTCTTC<br>ACTCACGATGGGGCAGCAG<br>CGAGCCCACCCACGCTGTCTTG                 |
| 24 | <i>Slc38a1</i>  | Snat1  | AF184240     | forward<br>reverse<br>probe | CGCGTGCACACCAAAGTATG<br>AGATTGGCAGGACGGACG<br>TACCAACCATCGCCTTCGCGTTTG               |
| 25 | <i>Slc38a2</i>  | Snat2  | BC041108     | forward<br>reverse<br>probe | CCAATGAGATCCGTGCAAAA<br>TGGACCCAATCCAGCACAAAT<br>TCTGTGTTTTCTCCTGAGTGGCATAGTGGTG     |
| 26 | <i>Slc38a3</i>  | Snat3  | AF159856     | forward<br>reverse<br>probe | CGAATCATGCCACTGACAA<br>AACCGCAGCGAAACAAAGG<br>AGCCTGCAAGATCCACCCCTAAATCCT            |
| 27 | <i>Slc38a4</i>  | Snat4  | AK051023     | forward<br>reverse<br>probe | AGGGTGCTGAGA AATGCCAA<br>GACCTCAGGGTGGCAGAC AA<br>AATACTTTGTGTTCAATTCCCGGACGGC       |
| 28 | <i>Slc38a5</i>  | Snat5  | AK054485     | forward<br>reverse<br>probe | CCCTCACTGTGCCTGTTGTG<br>CTTGCTTGAAAGAGCAGCTG<br>CCCTATCCGCCGAGCCCTCCA                |
| 29 | <i>Slc38a6</i>  | Snat6  | BC043932     | forward<br>reverse<br>probe | CGCCGTGCTTCTGACAGCC<br>GGGAATGTCGGATCCAGGA<br>CTTTAATGATGATCCTGTTCTCCAATTACCCGTT     |
| 30 | <i>Slc38a7</i>  | Snat7  | NM_172758.4  | forward<br>reverse<br>probe | GGCTCTGACCCCATACCTTT<br>GGGGAACCTTTGTCAACCTG<br>Roche probe #6                       |
| 31 | <i>Slc43a1</i>  | Lat3   | NM_001081349 | forward<br>reverse<br>probe | CCCTGAATGAGAATGCTTCCTT<br>ATGGCATTGGT GAGCTTTTGT<br>AGCACCAAGTTCCTAGACCACGCTACCG     |
| 32 | <i>Slc43a2</i>  | Lat4   | NM_173388    | forward<br>reverse<br>probe | GCTGATTGCATATGGAGCAAGTAAC<br>CGAAGTGAACGT CATGCACAT<br>CTCTCTGTGCTCATCTTTATCGCCTTGGC |

Table S3: AA concentrations measured in CSF and plasma samples of wt and Lat2<sup>-/-</sup> animals

| Amino acids | Plasma concentrations, $\mu\text{mol/L} \pm\text{SD}$ |                       | CSF concentrations, $\mu\text{mol/L} \pm\text{SD}$ |                       |
|-------------|-------------------------------------------------------|-----------------------|----------------------------------------------------|-----------------------|
|             | LAT2 <sup>+/+</sup>                                   | LAT2 <sup>-/-</sup>   | LAT2 <sup>+/+</sup>                                | LAT2 <sup>-/-</sup>   |
| Ala         | 551.84 $\pm$ 276.83                                   | 685.12 $\pm$ 272.34   | 65.13 $\pm$ 17.40                                  | 116.60 $\pm$ 22.84*   |
| Arg         | 105.74 $\pm$ 22.15                                    | 118.54 $\pm$ 25.76    | 24.60 $\pm$ 5.35                                   | 37.18 $\pm$ 6.95*     |
| Asn         | 45.13 $\pm$ 6.20                                      | 78.42 $\pm$ 13.81**   | 5.28 $\pm$ 0.84                                    | 9.09 $\pm$ 1.39**     |
| Asp         | 12.43 $\pm$ 5.27                                      | 15.25 $\pm$ 7.59      | 5.08 $\pm$ 3.39                                    | 42.86 $\pm$ 28.70*    |
| Gln         | 738.08 $\pm$ 143.83                                   | 1103.16 $\pm$ 235.80* | 553.43 $\pm$ 141.16                                | 1191.18 $\pm$ 653.97  |
| Glu         | 24.05 $\pm$ 11.86                                     | 42.92 $\pm$ 37.36     | 13.29 $\pm$ 9.47                                   | 97.44 $\pm$ 36.85**   |
| Gly         | 280.23 $\pm$ 48.56                                    | 344.90 $\pm$ 67.12    | 27.14 $\pm$ 9.30                                   | 101.53 $\pm$ 21.88*** |
| His         | 76.28 $\pm$ 7.56                                      | 86.01 $\pm$ 17.19     | 5.76 $\pm$ 1.63                                    | 11.73 $\pm$ 5.77      |
| Leu         | 134.80 $\pm$ 30.83                                    | 141.02 $\pm$ 26.64    | 5.52 $\pm$ 1.22                                    | 12.04 $\pm$ 2.28**    |
| Lys         | 286.73 $\pm$ 54.65                                    | 318.88 $\pm$ 74.51    | 48.28 $\pm$ 13.46                                  | 62.87 $\pm$ 16.61     |
| Met         | 60.18 $\pm$ 8.20                                      | 63.29 $\pm$ 10.63     | 7.97 $\pm$ 1.91                                    | 10.63 $\pm$ 3.46      |
| Phe         | 70.87 $\pm$ 15.26                                     | 75.29 $\pm$ 19.53     | 4.30 $\pm$ 1.03                                    | 8.63 $\pm$ 5.79       |
| Pro         | 83.49 $\pm$ 24.56                                     | 129.50 $\pm$ 31.84    | 2.57 $\pm$ 1.63                                    | 14.62 $\pm$ 3.26***   |
| Ser         | 143.03 $\pm$ 16.32                                    | 181.59 $\pm$ 19.50*   | 41.29 $\pm$ 8.70                                   | 57.37 $\pm$ 14.83     |
| Thr         | 159.46 $\pm$ 12.67                                    | 181.22 $\pm$ 35.38    | 26.42 $\pm$ 5.75                                   | 33.58 $\pm$ 9.04      |
| Trp         | 65.22 $\pm$ 9.41                                      | 65.21 $\pm$ 10.92     | 5.02 $\pm$ 1.36                                    | 15.10 $\pm$ 10.24     |
| Tyr         | 73.34 $\pm$ 15.35                                     | 84.14 $\pm$ 27.84     | 7.35 $\pm$ 1.18                                    | 13.55 $\pm$ 6.31      |
| Val         | 214.17 $\pm$ 39.40                                    | 244.16 $\pm$ 31.09    | 8.34 $\pm$ 1.32                                    | 20.86 $\pm$ 2.38***   |
| Ile         | 88.20 $\pm$ 20.92                                     | 94.97 $\pm$ 16.00     | not reliably detected in CSF                       |                       |
| Tau         | 486.92 $\pm$ 212.65                                   | 586.43 $\pm$ 220.02   | 207.24 $\pm$ 128.24                                | 713.53 $\pm$ 243.52*  |

<sup>1</sup>Data compared with unpaired t-test and statistically significant changes are indicated as \*\*\*p<0.001, \*\* p<0.01, \*p<0.05.
