# Supplementary material for: Choroid plexus LAT2 and SNAT3 as partners in CSF amino acid homeostasis maintenance
Source: Fluids Barriers CNS. 2020 Feb 11;17:17. doi: 10.1186/s12987-020-0178-x (PMC7014681; doi:10.1186/s12987-020-0178-x)

## **Choroid plexus LAT2 and SNAT3 as partners in CSF amino acid homeostasis maintenance**

Elena Dolgodilina, Simone M. Camargo, Eva Roth, Brigitte Herzog, Virginia Nunes, Manuel Palacín, Francois Verrey

### **Additional File 1 Supplementary Figures**

#### **Figure Legends**

**Figure S1.** Expression profile of 32 *Slc* genes in isolated choroid plexuses (n=3).

For each AA transporter gene, mRNA levels were measured by qPCR relative to 18S rRNA and presented as mean  $\pm$  SD.

**Figure S2** Assessment of LAT2 knockout in the brain tissue

- A. Significant reduction of *Lat2* mRNA in CP (white bars) and cerebrum (dotted grey bars) of LAT2 KO mice compared to wild-type samples. Data shown as mean  $\pm$  SD and compared with unpaired t-test, n=5 for KO's and wt CP, 4 for wt cerebrum, \*\*\*p<0.001.
- B. Representative staining of LAT2 transporter (green) in wt and LAT2 KO CP paraffin sections. Nuclei are counterstained with DAPI (blue). Scale bar is 50  $\mu$ m.

Figure S1.

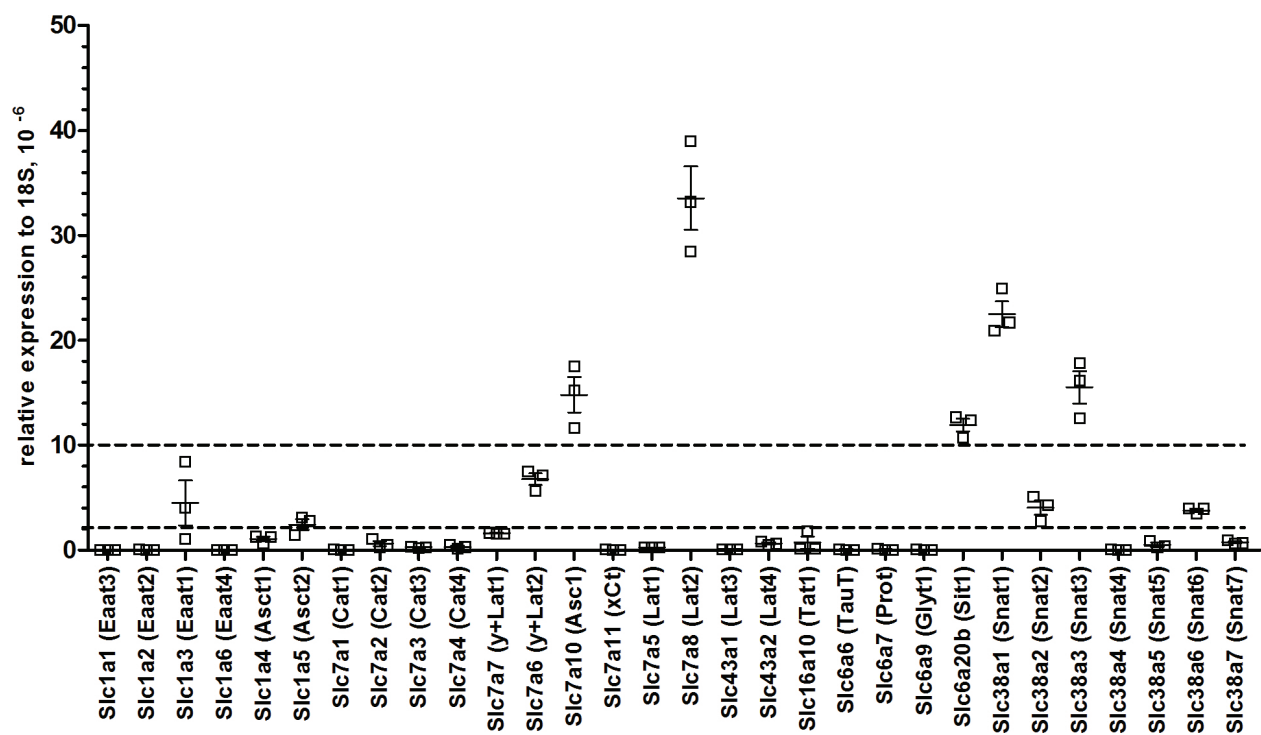

**Figure S2.**

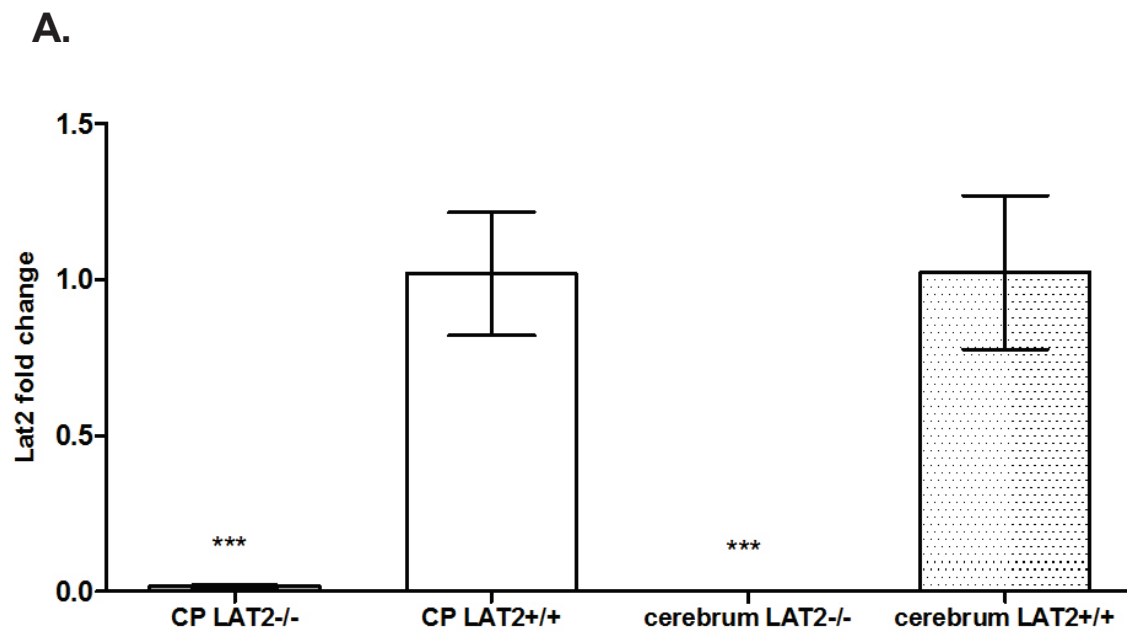

**B.**

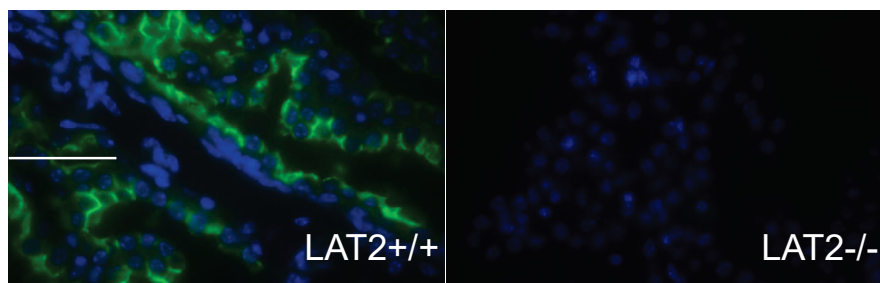

Supplement: Supplementary file 1 — Additional file 1: Figure S1. Expression profile of 32 Slc genes in isolated choroid plexuses (n = 3). Figure S2. Assessment of LAT2 knockout in the brain tissue. [file 12987_2020_178_MOESM1_ESM.pdf]
